# Supplementary material for: High-performance, recyclable, and multifunctional nitrile butadiene rubber based on hydrogen and urea bonds
Source: Royal Society of Chemistry journal article supplement (doi:10.1039/d4ta09201e), 2025-01-01
Supplement: d4ta09201e1.pdf [file d4ta09201e1.pdf]

## **Supplementary Information**

### **High-performance, recyclable, and multifunctional nitrile butadiene rubber based on hydrogen and urea bonds**

**Lin Wang<sup>1</sup>, Manman Jia<sup>1</sup>, Hui Jiao<sup>1</sup>, Shukang Ti<sup>1</sup> and Dongmei Yue<sup>\*1,2</sup>**

<sup>1</sup>State Key Laboratory of Organic-Inorganic Composites, Beijing University of  
Chemical Technology, Beijing, 100029, China

Key Laboratory of Beijing City on  
Preparation and Processing of Novel  
Polymer Materials, Beijing University of  
Chemical Technology, Beijing, China

<sup>2</sup>Key Laboratory of Beijing City on Preparation and Processing of Novel Polymer  
Materials, Beijing University of Chemical Technology, Beijing, 100029, China

\*Corresponding author:

E-mail: yuedm@mail.buct.edu.cn

**Table S1** Compositions of the samples.

| Sample                               | Molar ratio<br>IPDI: ATBN: PPD | HS content<br>(%) |
|--------------------------------------|--------------------------------|-------------------|
| I-A <sub>0.7</sub> -P <sub>0.3</sub> | 1:0.7:0.3                      | 8.7               |
| I-A <sub>0.6</sub> -P <sub>0.4</sub> | 1:0.6:0.4                      | 10.3              |
| I-A <sub>0.5</sub> -P <sub>0.5</sub> | 1:0.5:0.5                      | 12.6              |
| I-A <sub>0.4</sub> -P <sub>0.6</sub> | 1:0.4:0.6                      | 15.8              |
| I-A <sub>0.3</sub> -P <sub>0.7</sub> | 1:0.3:0.7                      | 20.4              |

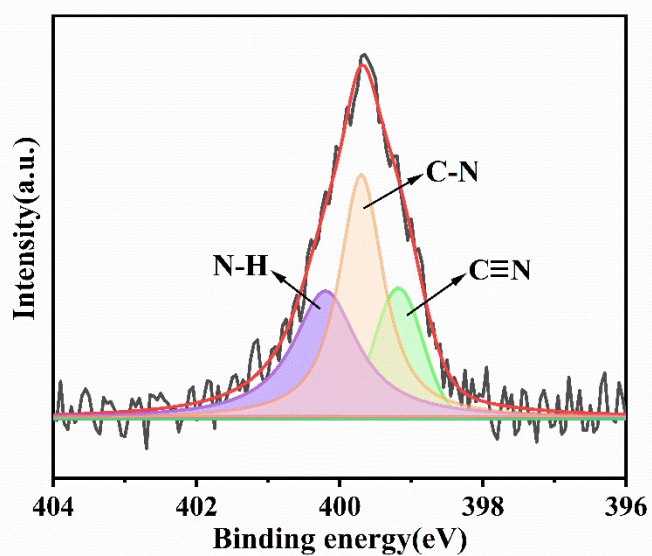

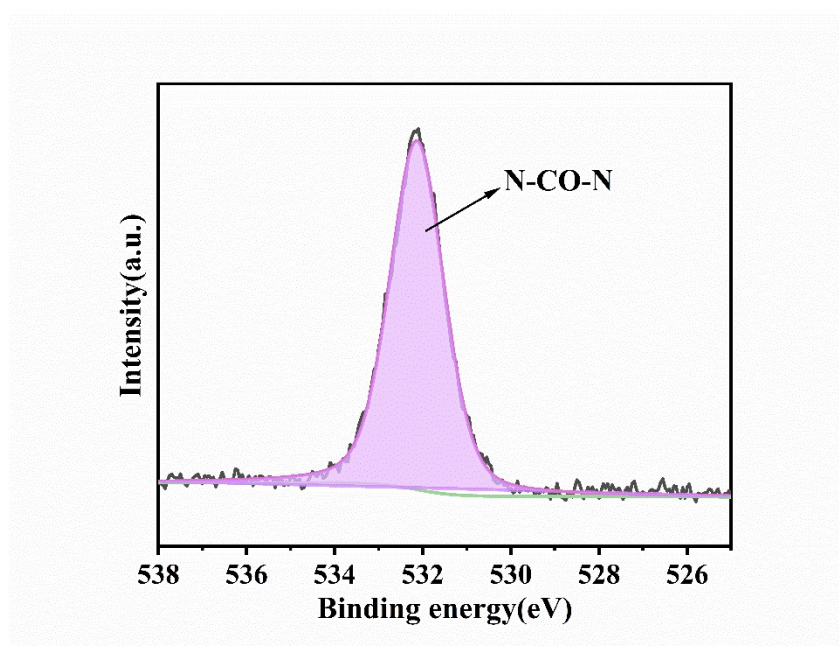

**Fig. S1** XPS spectra of the N 1s and O 1s orbital and their fitting curves of the I-A<sub>0.5</sub>-P<sub>0.5</sub>.

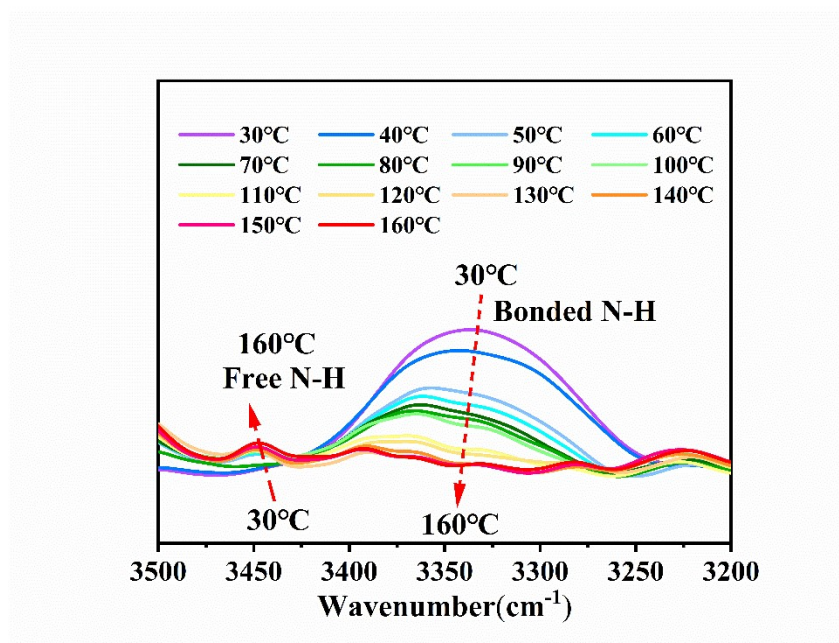

**Fig. S2** *In situ* variable-temperature FT-IR spectra of the I-A<sub>0.5</sub>-P<sub>0.5</sub> during the healing process of N-H stretching vibration band.

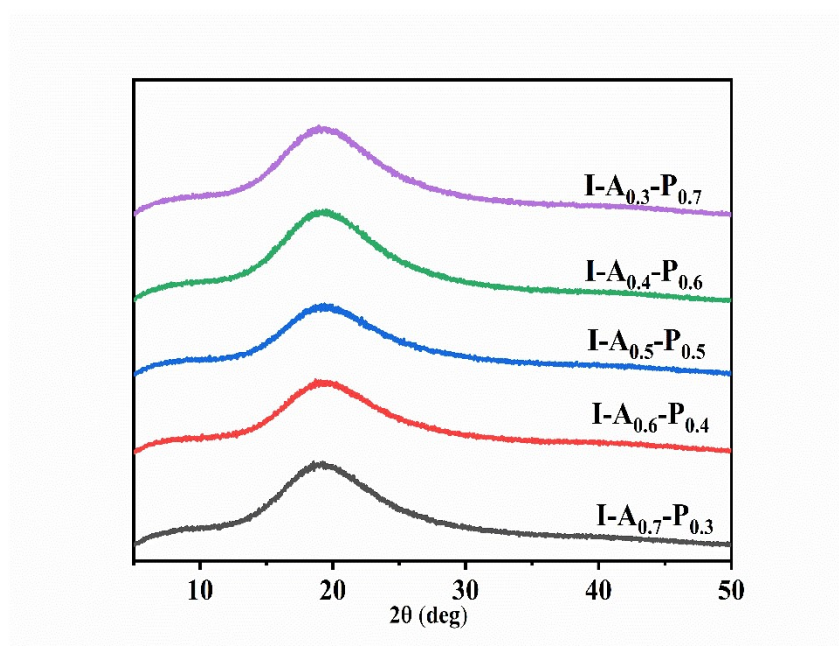

**Fig. S3** WAXD curves of IPDI-ATBN-PPD.

**Table S2** The mechanical performance values of the samples.

| Sample      | Tensile strength<br>(MPa) | Elongation at break<br>(%) |
|-------------|---------------------------|----------------------------|
| I-A0.7-P0.3 | 9.6±0.2                   | 907±20                     |
| I-A0.6-P0.4 | 15.2±0.5                  | 949±30                     |
| I-A0.5-P0.5 | 19.9±0.6                  | 984±50                     |
| I-A0.4-P0.6 | 13.4±0.4                  | 764±25                     |
| I-A0.3-P0.7 | 10.7±0.6                  | 528±18                     |

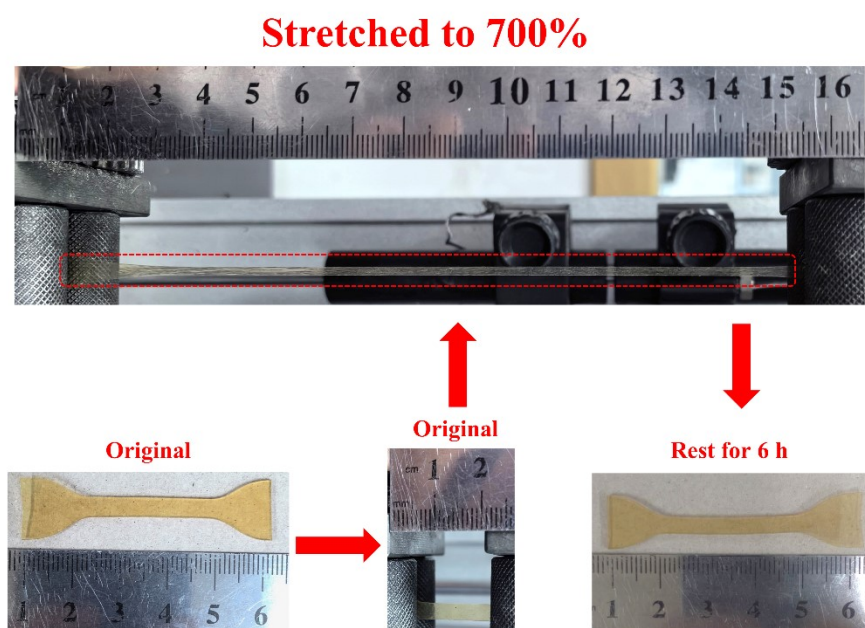

**Fig. S4** Excellent elastic recovery ability of the I-A<sub>0.5</sub>-P<sub>0.5</sub>.

**Table S3** The mechanical performance values of I-A<sub>0.5</sub>-P<sub>0.5</sub> before and after repeated processing.

| Sample                                                   | Tensile strength (MPa) | Elongation at break (%) |
|----------------------------------------------------------|------------------------|-------------------------|
| I-A <sub>0.5</sub> -P <sub>0.5</sub> (Original)          | 19.9±0.6               | 984±50                  |
| I-A <sub>0.5</sub> -P <sub>0.5</sub> -1 <sup>st</sup> -R | 18.7±0.4               | 901±30                  |
| I-A <sub>0.5</sub> -P <sub>0.5</sub> -2 <sup>nd</sup> -R | 18.1±0.5               | 862±40                  |
| I-A <sub>0.5</sub> -P <sub>0.5</sub> -3 <sup>rd</sup> -R | 17.3±0.7               | 879±45                  |
| I-A <sub>0.5</sub> -P <sub>0.5</sub> -4 <sup>th</sup> -R | 17.2±0.3               | 955±35                  |
| I-A <sub>0.5</sub> -P <sub>0.5</sub> -5 <sup>th</sup> -R | 16.1±0.5               | 975±46                  |



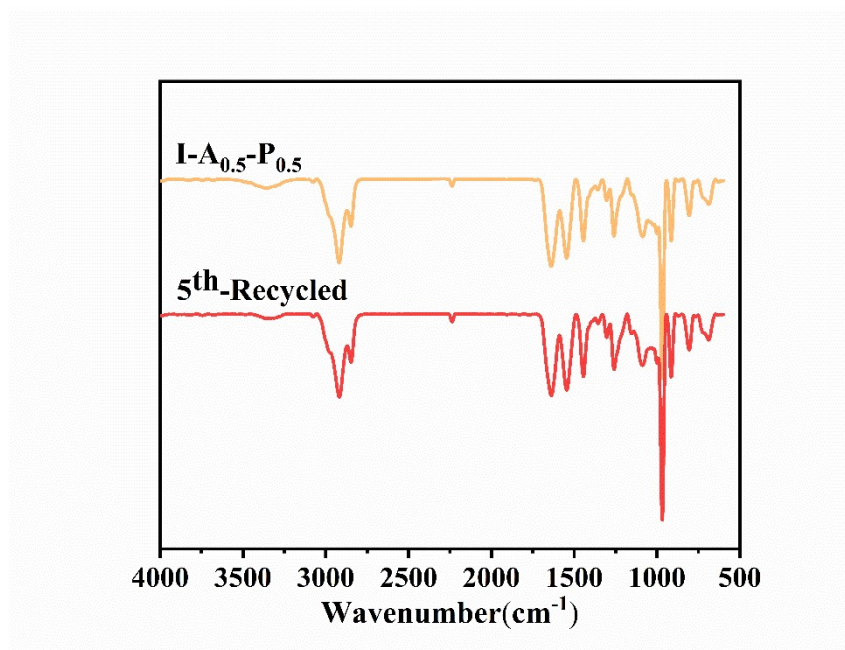

**Fig. S5** FT-IR spectra of I-A<sub>0.5</sub>-P<sub>0.5</sub> original and after recycling five times.

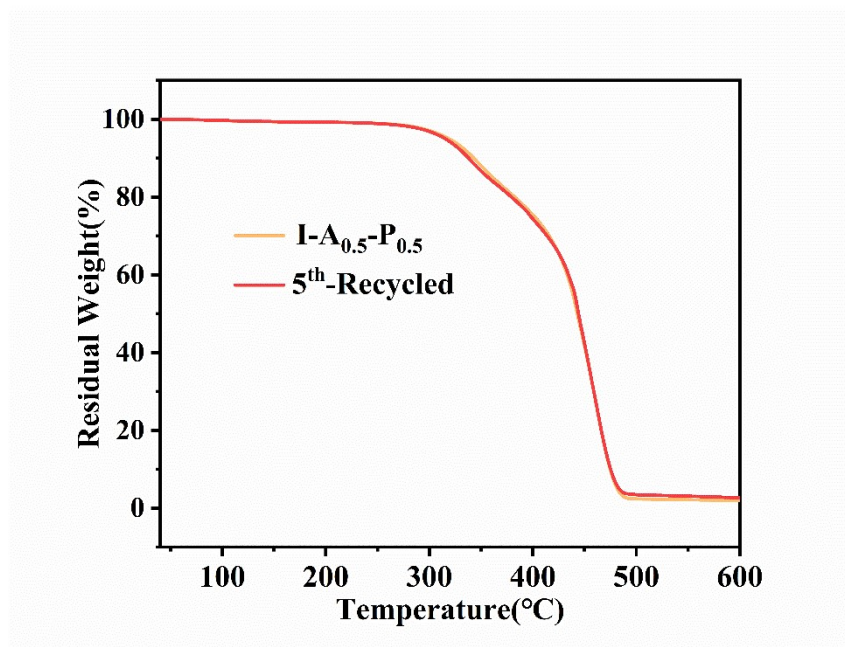

**Fig. S6** TGA spectra of I-A<sub>0.5</sub>-P<sub>0.5</sub> original and after recycling five times.

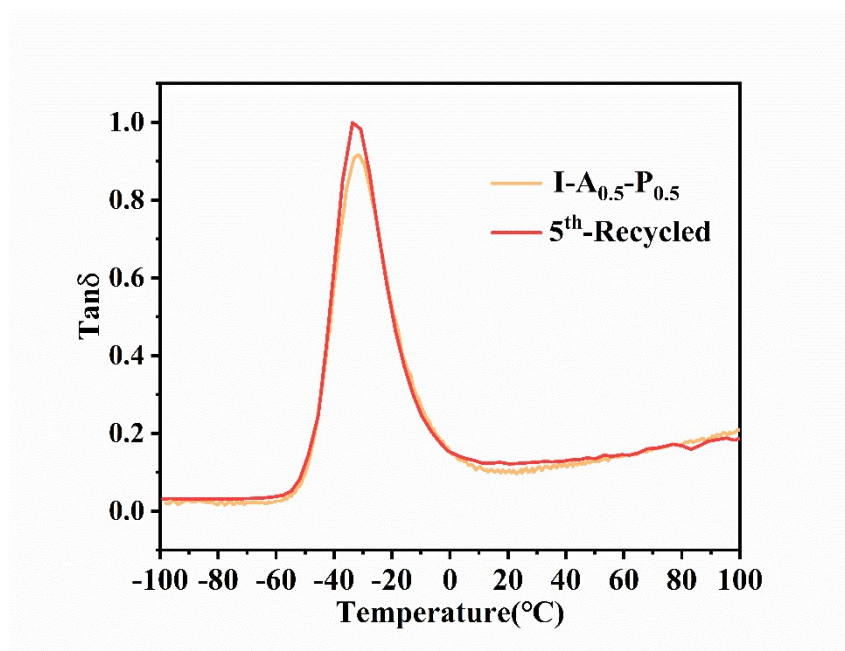

**Fig. S7** DMA spectra of I-A<sub>0.5</sub>-P<sub>0.5</sub> original and after recycling five times.

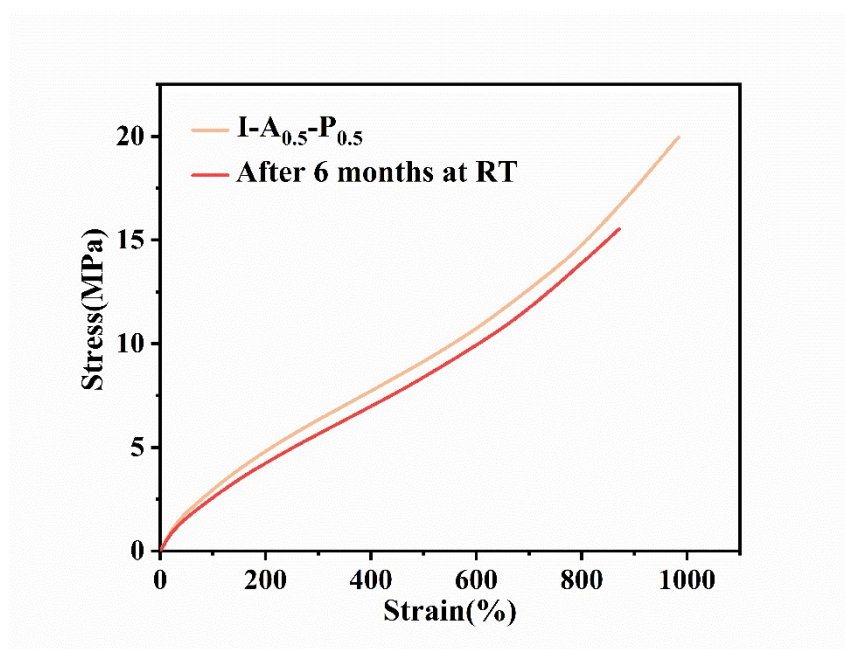

**Fig. S8** The stress-strain curves of I-A<sub>0.5</sub>-P<sub>0.5</sub> original and after 6 months at RT.

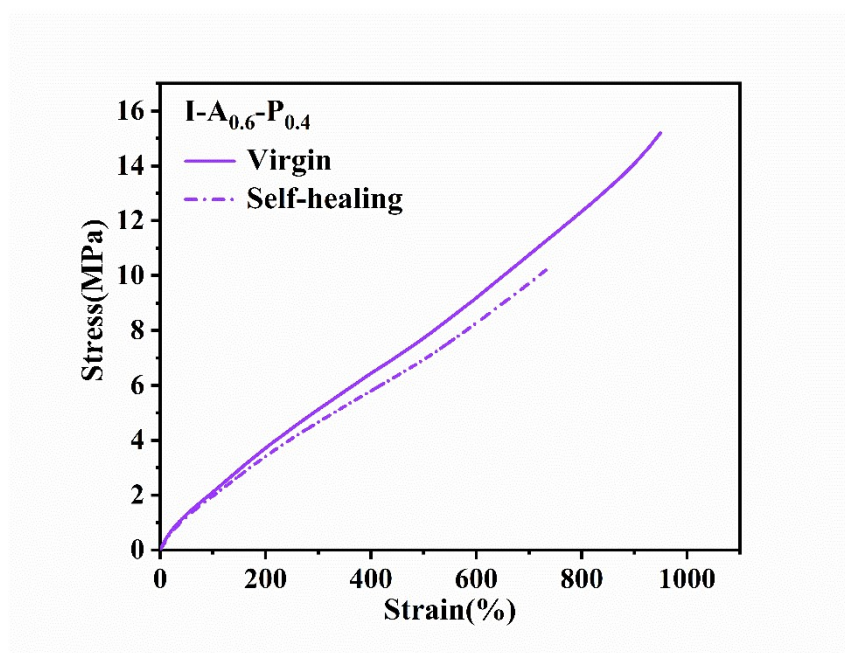

**Fig. S9** The stress–strain curves of I-A<sub>0.6</sub>-P<sub>0.4</sub> original and the cut sample after self-healing at 80 °C for 6 h.

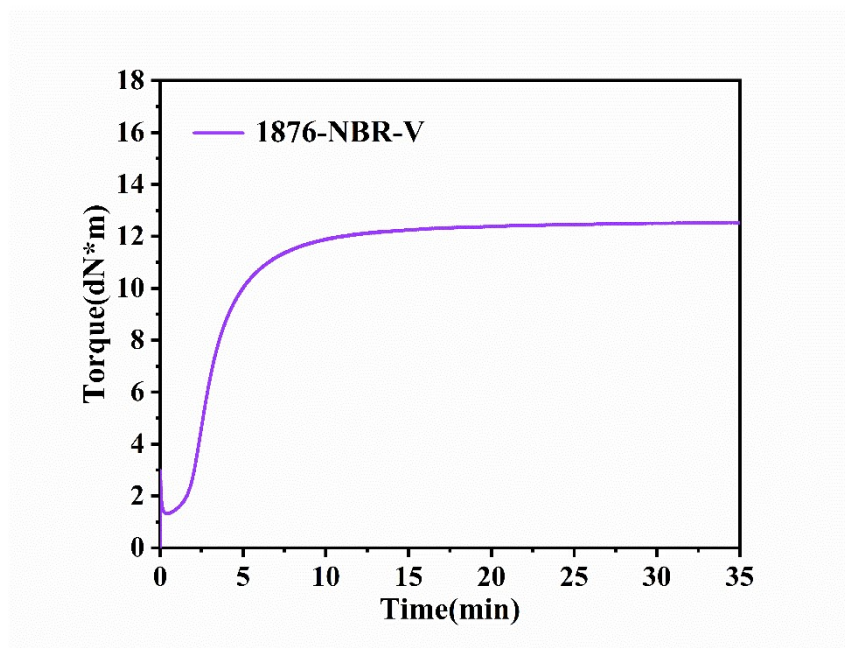

**Fig. S10** Vulcanization curves of 1876-NBR-V.



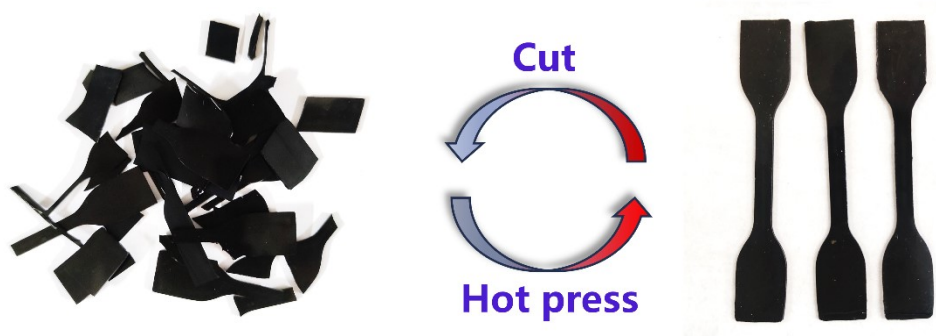

**Fig. S11** Reprocessability of I-A<sub>0.5</sub>-P<sub>0.5</sub>-V
